# Supplementary material for: Science and Technology Parks: laboratories of innovation for urban development - an approach from Brazil
Source: Springer Nature journal article supplement (doi:10.1186/s40604-015-0018-1), 2015-06-01
Supplement: MOESM1 [file 11901852]

## مجمعات العلوم والتكنولوجيا: مختبرات للابتكار في التنمية الحضرية- نظرية من البرازيل

يعيش جزء كبير من سكان البرازيل (85%) في المناطق الحضرية. يتواجد نصف السكان تقريبا في المدن الكبيرة، والتي تعد 750 ألف سكان أو أكثر. يفسر الاتجاه الى التحضر بحركات الهجرة التاريخية التي وقت خاصة قبل الظاهرة الأخيرة للعولمة. ومع ذلك، يتسم نمو هذه المراكز الحضرية بعدم وجود سياسات حكومية قادرة على ضمان جودة الحياة لسكانها.

الفرضية الرئيسية المطروحة في هذه الورقة هي امكانية اعتماد المدن الكبرى يمكن على استراتيجية إنشاء مختبرات الابتكار التي تركز في بحوثها على التنمية الحضرية. ويتطلب هذا من السلطات المحلية تنظيم طرق لتحفيز المواطنين، أو على الأقل بعض شرائح السكان، على استخدام الإبداع والمعرفة من أجل اقتراح حلول مبتكرة مجدية للمشاكل الحضرية الخطيرة التي يواجهونها. وفي هذا السياق، تولت في البرازيل، مجمعات العلوم والتكنولوجيا دور مختبرات الابتكار.

يهدف هذا البحث الى دراسة مجمعات العلوم والتكنولوجيا ، ومساهمتها الممكنة في التحولات المستدامة للمدن والمناطق البرازيلية الكبيرة وذات كثافة سكانية، والاقتصاد ذو الدخل المتوسط والعالي والمتنوع على الصعيد المحلي. كما يهدف هذا البحث الى الاجابة على السؤال التالي: ما الذي يجعل مجمعات العلوم والتكنولوجيا تسهم في تحسين نوعية التنمية الحضرية؟ تعتمد المنهجية المتبعة للاجابة على هذا السؤال الخطوات التالية : (I) التشخيص الاولي ؛ (II) دراسة الممارسات الجيدة ؛ (III) اعادة قراءة المعلومات – استخلاص الدروس الرئيسية – إعادة النظر في نماذج مجمعات العلوم والتكنولوجيا.

استناداً إلى استعراض التجربة البرازيلية، يبين هذا المقال أن (I) مجمعات العلوم والتكنولوجيا عملت في أجزاء مختلفة من البلاد كمختبرات للابتكار وأنتجت حلولاً في مجال التنمية الحضرية؛ (II) كما في الاقتصاديات ذات الدخل المرتفع – أساساً في الولايات المتحدة الأمريكية، حيث أنها نشأت في الخمسينات، كانت مجمعات العلوم والتكنولوجيا في الاقتصاديات ذات الدخل المتوسط الأعلى قدرة على أن تصبح مراكز النظم الإيكولوجية للابتكار في مختلف المدن والمناطق (III) هناك حاجة ملحة للاستخدام أدوات تساعد مجمعات العلوم والتكنولوجيا على التخطيط والتنسيق، من أجل تحقيق مستوى من التعاون المؤسسي في المدينة أو المنطقة التي تمكن من اعتماد نظم إيكولوجية للابتكار شبيهة بونموذج "المراوح الثلاثة" كرافعة للتحول الحضري المستدام.
